# Supplementary material for: Spatiotemporal dynamics of triglyceride storage in unilocular adipocytes
Source: PubMed Central journal article supplement — Mol Biol Cell. 2014 Dec 15;25(25):4096–105. doi: 10.1091/mbc.E14-06-1085 (PMC4263452; doi:10.1091/mbc.e14-06-1085), 2014-12-15
Supplement: supp_E14-06-1085v1_CombinedSupMats.pdf [file supp_E14-06-1085v1_CombinedSupMats.pdf]

# Supplemental Materials

*Molecular Biology of the Cell*

Chu et al.

#### Video 1

3D reconstruction of a unilocular adipocyte shows mLDs (green) and ER patches on the surface of the cLD (dark interior).

#### Video 2

Time-lapse microscopy of living unilocular adipocytes. Insulin-stimulated WAT explants were labeled with BODIPY-C12 for 15 min, rinsed in warm media, and placed on a confocal stage equilibrated to 37°C. Images were recorded in the xyzt-mode every 5 min.

#### Video 3

Dynamics of mLDs. Insulin-stimulated WAT explants were labeled with BODIPY-C12 for 15 min, chased in label-free media for 30 min, and studied by time-lapse confocal microscopy. Images were recorded in the xyzt-mode every 20 s
